# Supplementary material for: Biomimetic Groundwork for Thermal Exchange Structures Inspired by Plant Leaf Design
Source: Biomimetics (Basel). 2019 Nov 27;4(4):75. doi: 10.3390/biomimetics4040075 (PMC6963917; doi:10.3390/biomimetics4040075)
Supplement: Supplementary file 1 [file biomimetics-04-00075-s001.xlsx]

## Sheet: Average by species
Biomimetics MDPI - "Biomimetic Groundwork for Thermal Exchange Structures Inspired by Plant Leaf Design" A.I.K.S. Rupp, P. Gruber
Supplemental material Table S1: "Average shape parameter values of sun and shade leaves from multiple oak species." Base unit: cm
Species	Sun / Shade	Photo1	Number of leaves	Area	Area Convex Hull	Perimeter	Perimeter Convex Hull	Feret Diameter	Minimum Feret Diameter	Maximum Inscrobed Circle Diameter	Area Equivalent Circle Diameter	Long Side Length MBR	Short Side Length MBR	Aspect Ratio	Elongation	Area to Perimeter Ratio	LDI	Convexity	Solidity	Circularity	Roundness	Contour Temperature	Fractal Dimension	Fractal Dimension Goodness			Parameter legend, adapted from ImageJ reference for ShapeFilter plugin:
Q.alba	SHADE		26	47.0658	58.3794	44.063	28.9983	11.6482	7.23388	2.22862	7.55081	9.85742	7.68131	1.61022	0.215664	1.04023	43.3251	0.678615	0.818	0.318885	0.703346	0.379692	1.96388	1			Area (A): area enclosed by the outer contour of the leaf
Q.alba	SUN		21	55.9517	82.0853	63.7392	33.6905	13.2631	8.57814	2.60643	8.07481	11.335	8.89724	1.54616	0.225018	0.838524	81.0274	0.562762	0.684857	0.195524	0.619453	0.457905	1.95205	1			Area Convex Hull (C): area enclosed by the convex hull of the outer contour of the leaf
Q. bicolor	SHADE		10	52.0132	57.7633	40.9475	29.8337	12.5403	6.8962	3.9398	8.053	11.3677	7.1557	1.81844	0.366753	1.2657	33.1056	0.7447	0.9019	0.406	0.73436	0.3368	1.9723	1			Perimeter (P): perimeter of the outer contour of the leaf
Q. bicolor	SUN		10	54.4243	61.0968	41.0493	30.784	12.7841	7.1931	2.3378	8.2365	11.6075	7.397	1.77727	0.367231	1.3038	31.8825	0.7527	0.8926	0.4025	0.721693	0.3317	1.9721	1			Perimeter Convex Hull (H): perimeter of the convex hull of the leaf
Q. elipsoidalis	SHADE		16	24.2545	41.2534	45.2237	22.8085	8.27744	6.35425	1.25838	5.34975	7.40031	6.61738	1.30266	0.115262	0.505063	91.2494	0.516125	0.584313	0.146813	0.58588	0.489188	1.92844	0.999875			Feret Diameter: maximum distance between two parallel tangents touching the leaf outline in all directions
Q. elipsoidalis	SUN		7	40.3974	89.8154	68.1967	33.525	11.6004	9.65786	1.03471	6.89857	10.5119	10.0059	1.20114	0.0531378	0.556286	120.683	0.508	0.462143	0.112857	0.451675	0.495	1.933	0.999857			Minimum Feret Diameter: minimum distance between two parallel tangents touching the leaf outline in all directions
Q. falcata	SHADE		6	24.7375	27.6287	23.2838	19.8345	7.81133	4.89267	4.02267	5.5895	7.16467	5.17083	1.59654	0.262435	1.05767	22.0757	0.8565	0.8965	0.577167	0.790175	0.261667	1.9645	1			Maximum Inscribed Circle Diameter: diameter of the largest inscribed circle within the leaf contour
Q. falcata	SUN		5	77.8688	99.6528	50.3988	37.61	14.5302	9.714	2.0882	9.8992	12.9634	10.0548	1.4958	0.227347	1.5322	32.727	0.7524	0.7864	0.3898	0.691778	0.3314	1.975	1			Area Equivalent Circle Diameter: diameter of the circle of equivalent area to the leaf, i.e.
Q. imbricaria	SHADE		8	21.9899	22.3203	22.5566	21.2928	9.89238	3.20312	2.25663	5.24325	9.85588	3.20463	3.08835	0.674926	0.957875	23.6038	0.94425	0.985125	0.5335	0.609494	0.192875	1.96325	1			Long Side Minimum Bounding Rectangle (L): length of the larger side of the minimum bounding rectangle
Q. imbricaria	SUN		6	32.5328	33.3613	46.5027	26.346	12.1965	3.80867	0.633667	6.40617	12.1755	3.80733	3.2023	0.685822	0.765667	70.4518	0.636	0.976	0.265	0.588982	0.409	1.968	1			Short Side Minimum Bounding Rectangle (S): length of the smaller side of the minimum bounding rectangle
Q. macrocarpa	SHADE		13	49.333	61.3478	58.7823	30.6561	12.5778	7.34885	1.75208	7.79877	11.4005	7.52015	1.71154	0.329666	0.84	72.3602	0.546538	0.802385	0.197	0.659651	0.469231	1.96038	1			Aspect Ratio: defined as the ratio of the leaf's Feret diameter to its minimum Feret diameter
Q. macrocarpa	SUN		11	48.5099	65.6059	76.0903	31.3514	12.7907	7.70064	1.53582	7.75836	11.0245	8.08191	1.661	0.270274	0.639182	127.233	0.42	0.746455	0.11	0.620194	0.561636	1.95282	1			Elongation: defined as 1 - S/L
Q. nigra	SHADE		13	12.0309	12.9296	25.1276	14.2123	5.77785	3.29746	0.341462	3.81415	5.43754	3.32246	1.75221	0.381059	0.501231	61.515	0.616	0.930077	0.302385	0.748479	0.422769	1.94823	1			Area to Perimeter Ratio: defined as A/P
Q. nigra	SUN		10	10.0236	11.1625	36.0192	13.3169	5.4676	2.9635	0.0105	3.4853	5.2786	2.9783	1.84498	0.442305	0.2669	136.494	0.3728	0.9042	0.0946	0.710276	0.5982	1.9431	1			LDI: defined as P2/A
Q. robur	SHADE		2	25.79	30.617	59.9215	21.8665	9.1045	4.7925	0.009	5.7285	8.811	4.861	1.89974	0.448262	0.433	139.76	0.368	0.843	0.093	0.677802	0.602	1.957	1			Convexity: defined as H/P
Q. robur	SUN		5	32.1354	38.0172	37.9546	23.6572	9.8524	4.962	1.2098	6.1738	9.7464	4.9766	1.98557	0.493612	0.8316	49.0906	0.6718	0.8574	0.316	0.721551	0.3866	1.9584	1			Solidity: defined as A/C
Q. rubra	SHADE		3	48.929	76.0297	71.559	32.309	12.7727	8.10133	0.03	7.76733	10.498	8.909	1.57661	0.145716	0.689	105.867	0.478	0.664	0.137333	0.589019	0.517667	1.95067	1			Circularity: defined as
Q. rubra	SUN		10	52.8427	86.135	85.5913	34.381	13.1679	9.175	1.0299	8.1788	10.6649	10.1908	1.43519	0.0441905	0.6227	140.842	0.4074	0.6164	0.0946	0.561769	0.5708	1.9443	1			Roundness: defined as
Q. shumardi	SHADE		2	46.7865	80.9075	86.9175	33.223	12.1355	9.4255	0.009	7.718	10.3375	9.7515	1.28752	0.0548738	0.541	162.067	0.384	0.579	0.079	0.532663	0.5885	1.943	1			Contour Temperature: defined as
Q. shumardi	SUN		8	53.2791	88.8789	64.4975	34.4525	12.6965	9.421	1.8565	8.043	10.9341	9.71225	1.34768	0.112766	0.795625	83.8386	0.53575	0.596375	0.15525	0.56406	0.47525	1.95	1			Fractal Box Dimension: estimated fractal dimension by the box count algorithm (default box-sizes - 2,3,4,6,8,12,16,32,64)
Q. velutina	SHADE		3	42.4723	78.324	64.3833	32.5803	11.6073	9.097	1.41567	7.29833	10.5227	9.392	1.27595	0.113284	0.654333	97.9243	0.514667	0.547333	0.132333	0.502811	0.49	1.95067	1
Q. velutina	SUN		3	75.3133	107.958	71.634	37.714	14.097	10.4067	2.67767	9.617	11.681	11.1023	1.35461	0.0511127	1.01433	71.4383	0.524333	0.702333	0.176333	0.66539	0.482667	1.964	1
		1 leaf contours not to scale

## Sheet: All leaves
Biomimetics MDPI - "Biomimetic Groundwork for Thermal Exchange Structures Inspired by Plant Leaf Design" A.I.K.S. Rupp, P. Gruber
Supplemental material Table S2: "Shape analysis (single-parameter metrics) of sun and shade leaves across multiple oak species." Base unit: cm
Species	Number of Plant Replicates	Location	Sun / Shade	Leaf #	Area	Area Convex Hull	Perimeter	Perimeter Convex Hull	Feret Diameter	Minimum Feret Diameter	Maximum Inscrobed Circle Diameter	Area Equivalent Circle Diameter	Long Side Length MBR	Short Side Length MBR	Aspect Ratio	Elongation	Area to Perimeter Ratio	LDI	Convexity	Solidity	Circularity	Roundness	Contour Temperature	Fractal Dimension	Fractal Dimension Goodness			Parameter legend, adapted from ImageJ reference for ShapeFilter plugin:
Q.alba	1	The Holden Arboretum, Kirtland, OH (USA)	SHADE	1	66.133	78.398	69.399	35.086	14.706	7.753	0.05	9.176	14.707	7.749	1.89681	0.473108	0.953	72.826	0.506	0.844	0.173	0.675088	0.496	1.971	1			Area (A): area enclosed by the outer contour of the leaf
Q.alba			SHADE	2	86.212	97.954	55.719	36.947	14.406	9.72	0.017	10.477	11.15	10.649	1.4821	0.0449327	1.547	36.011	0.663	0.88	0.349	0.793632	0.389	1.98	1			Area Convex Hull (C): area enclosed by the convex hull of the outer contour of the leaf
Q.alba			SHADE	3	88.347	105.691	58.341	39.547	15.432	10.874	4.482	10.606	11.995	11.601	1.41916	0.032847	1.514	38.526	0.678	0.836	0.326	0.709863	0.38	1.973	1			Perimeter (P): perimeter of the outer contour of the leaf
Q.alba			SHADE	4	73.231	88.908	51.831	35.6	13.993	9.499	0.038	9.656	11.102	9.817	1.4731	0.115745	1.413	36.685	0.687	0.824	0.343	0.726114	0.374	1.972	1			Perimeter Convex Hull (H): perimeter of the convex hull of the leaf
Q.alba			SHADE	5	56.69	67.599	45.106	32.1	13.289	7.627	0.017	8.496	11.231	8.305	1.74236	0.260529	1.257	35.888	0.712	0.839	0.35	0.691363	0.358	1.97	1			Feret Diameter: maximum distance between two parallel tangents touching the leaf outline in all directions
Q.alba			SHADE	6	28.577	33.713	33.691	23.07	9.496	5.381	0.019	6.032	8.983	5.382	1.76473	0.400868	0.848	39.72	0.685	0.848	0.316	0.674732	0.375	1.96	1			Minimum Feret Diameter: minimum distance between two parallel tangents touching the leaf outline in all directions
Q.alba			SHADE	7	36.974	43.27	37.305	25.16	10.114	6.238	4.552	6.861	7.841	6.923	1.62135	0.117077	0.991	37.64	0.674	0.854	0.334	0.733981	0.382	1.965	1			Maximum Inscribed Circle Diameter: diameter of the largest inscribed circle within the leaf contour
Q.alba			SHADE	8	18.742	21.491	23.147	17.989	7.23	4.368	2.875	4.885	6.233	4.674	1.65522	0.25012	0.81	28.588	0.777	0.872	0.44	0.7278	0.316	1.958	1			Area Equivalent Circle Diameter: diameter of the circle of equivalent area to the leaf, i.e.
Q.alba			SHADE	9	27.327	31.45	27.735	21.888	8.887	5.49	4.24	5.899	6.995	6.18	1.61876	0.116512	0.985	28.149	0.789	0.869	0.446	0.716786	0.308	1.966	1			Long Side Minimum Bounding Rectangle (L): length of the larger side of the minimum bounding rectangle
Q.alba			SHADE	10	66.761	80.334	52.271	34.501	13.756	8.94	4.77	9.22	11.561	8.93	1.5387	0.227575	1.277	40.925	0.66	0.831	0.307	0.704806	0.391	1.973	1			Short Side Minimum Bounding Rectangle (S): length of the smaller side of the minimum bounding rectangle
Q.alba			SHADE	11	75.989	94.772	59.322	37.768	14.949	9.451	0.024	9.836	13.523	9.456	1.58174	0.300747	1.281	46.311	0.637	0.802	0.271	0.669441	0.406	1.971	1			Aspect Ratio: defined as the ratio of the leaf's Feret diameter to its minimum Feret diameter
Q.alba			SHADE	12	46.569	58.383	51.858	29.068	11.644	7.461	0.258	7.7	9.027	8.402	1.56065	0.0692367	0.898	57.749	0.561	0.798	0.218	0.69259	0.457	1.961	1			Elongation: defined as 1 - S/L
Q.alba			SHADE	13	46.237	56.363	37.115	28.691	11.008	7.622	5.408	7.673	9.827	7.67	1.44424	0.219497	1.246	29.793	0.773	0.82	0.422	0.705843	0.319	1.968	1			Area to Perimeter Ratio: defined as A/P
Q.alba			SHADE	14	38.206	46.125	39.109	27.046	10.982	6.657	2.949	6.975	8.728	7.535	1.64969	0.136687	0.977	40.033	0.692	0.828	0.314	0.65635	0.371	1.962	1			LDI: defined as P2/A
Q.alba			SHADE	15	29.491	35.555	32.652	23.996	10.175	5.325	2.633	6.128	9.617	5.378	1.9108	0.440782	0.903	36.151	0.735	0.829	0.348	0.643608	0.343	1.965	1			Convexity: defined as H/P
Q.alba			SHADE	16	25.055	26.991	23.605	19.429	7.391	5.281	0.019	5.648	6.216	5.52	1.39955	0.111969	1.061	22.24	0.823	0.928	0.565	0.834072	0.286	1.969	1			Solidity: defined as A/C
Q.alba			SUN	1	92.377	131.346	90.169	44.658	17.928	11.195	3.349	10.845	14.876	11.942	1.60143	0.19723	1.024	88.014	0.495	0.703	0.143	0.58207	0.503	1.964	1			Circularity: defined as
Q.alba			SUN	2	58.851	81.651	62.564	34.767	13.907	8.738	3.456	8.656	11.325	9.424	1.59155	0.167859	0.941	66.511	0.556	0.721	0.189	0.611828	0.461	1.963	1			Roundness: defined as
Q.alba			SUN	3	114.016	152.179	109.719	46.581	17.881	12.829	0.012	12.049	14.715	13.041	1.3938	0.113761	1.039	105.583	0.425	0.749	0.119	0.660325	0.556	1.968	1			Contour Temperature: defined as
Q.alba			SUN	4	110.345	142.18	84.041	44.928	17.212	11.667	4.82	11.853	15.616	11.665	1.47527	0.25301	1.313	64.008	0.535	0.776	0.196	0.686955	0.475	1.972	1			Fractal Box Dimension: estimated fractal dimension by the box count algorithm (default box-sizes - 2,3,4,6,8,12,16,32,64)
Q.alba			SUN	5	44.388	54.898	41.811	27.202	9.847	7.481	0.012	7.518	8.6	7.505	1.31627	0.127326	1.062	39.384	0.651	0.809	0.319	0.753831	0.397	1.967	1
Q.alba			SUN	6	86.696	108.041	70.772	40.602	16.806	9.971	4.327	10.506	13.721	10.838	1.68549	0.210116	1.225	57.773	0.574	0.802	0.218	0.660867	0.448	1.971	1
Q.alba			SUN	7	67.039	84.918	52.163	34.721	13.382	9.484	5.939	9.239	10.751	9.802	1.41101	0.0882709	1.285	40.588	0.666	0.789	0.31	0.6988	0.388	1.971	1
Q.alba			SUN	8	130.864	165.67	85.483	47.89	18.158	12.887	5.907	12.908	16.338	12.885	1.40902	0.211348	1.531	55.839	0.56	0.79	0.225	0.717035	0.458	1.976	1
Q.alba	2	The Holden Arboretum, Kirtland, OH (USA)	SHADE	1	50.356	62.834	45.431	31.114	12.685	7.531	4.056	8.007	11.05	7.987	1.68437	0.277195	1.108	40.987	0.685	0.801	0.307	0.653656	0.375	1.964	1
Q.alba			SHADE	2	63.131	82.186	53.887	35.409	14.07	9.276	4.098	8.966	10.95	10.112	1.51682	0.0765297	1.172	45.996	0.657	0.768	0.273	0.63274	0.393	1.967	1
Q.alba			SHADE	3	28.437	34.515	31.803	23.224	9.607	5.405	3.154	6.017	7.45	6.724	1.77743	0.0974497	0.894	35.567	0.73	0.824	0.353	0.662551	0.346	1.961	1
Q.alba			SHADE	4	25.817	29.449	26.993	21.497	9.043	5.093	3.978	5.733	7.579	5.451	1.77557	0.280776	0.956	28.223	0.796	0.877	0.445	0.702037	0.303	1.963	1
Q.alba			SHADE	5	30.521	36.844	36.968	24.104	9.665	5.956	0.012	6.234	8.926	6.158	1.62273	0.310105	0.826	44.777	0.652	0.828	0.281	0.660131	0.396	1.955	1
Q.alba			SHADE	6	20.026	25.408	31.722	19.797	7.871	5.145	1.219	5.05	6.842	5.214	1.52983	0.237942	0.631	50.248	0.624	0.788	0.25	0.642104	0.415	1.945	1
Q.alba			SHADE	7	57.158	80.083	57.847	35.929	14.049	9.101	0.019	8.531	11.614	9.748	1.54368	0.160668	0.988	58.543	0.621	0.714	0.215	0.556412	0.417	1.962	1
Q.alba			SHADE	8	54.651	67.815	55.818	32.354	13.162	7.743	3.981	8.342	11.341	8.433	1.69986	0.256415	0.979	57.01	0.58	0.806	0.22	0.656073	0.444	1.962	1
Q.alba			SHADE	9	23.354	30.287	31.644	22.692	9.853	4.914	2.695	5.453	8.712	5.408	2.00509	0.379247	0.738	42.877	0.717	0.771	0.293	0.569935	0.354	1.947	1
Q.alba			SHADE	10	59.72	101.446	75.318	39.951	15.389	10.23	2.381	8.72	13.093	10.308	1.5043	0.212709	0.793	94.99	0.53	0.589	0.132	0.470191	0.478	1.951	1
Q.alba			SUN	1	32.92	55.892	58.383	29.196	11.63	7.151	2.245	6.474	10.254	7.669	1.62635	0.252097	0.564	103.539	0.5	0.589	0.121	0.485314	0.5	1.936	1
Q.alba			SUN	2	58.626	105.258	84.176	39.788	15.311	10.481	2.726	8.64	11.702	11.508	1.46083	0.0165784	0.696	120.861	0.473	0.557	0.104	0.465367	0.52	1.946	1
Q.alba			SUN	3	40.142	66.477	55.293	31.628	12.496	7.63	3.279	7.149	11.431	7.626	1.63775	0.332867	0.726	76.163	0.572	0.604	0.165	0.504273	0.45	1.95	1
Q.alba			SUN	4	27.553	40.478	44.153	24.346	9.467	6.317	1.234	5.923	8.648	6.326	1.49865	0.268501	0.624	70.756	0.551	0.681	0.178	0.584149	0.464	1.941	1
Q.alba			SUN	5	40.282	69.067	69.755	33.967	14.279	7.668	1.917	7.162	13.439	7.667	1.86215	0.429496	0.577	120.793	0.487	0.583	0.104	0.438739	0.509	1.936	1
Q.alba			SUN	6	37.834	73.465	65.026	33.448	12.738	8.754	1.212	6.941	11.061	8.908	1.45511	0.194648	0.582	111.76	0.514	0.515	0.112	0.424964	0.49	1.935	1
Q.alba			SUN	7	39.171	57.003	61.47	30.136	12.442	7.326	1.605	7.062	10.592	7.742	1.69833	0.269071	0.637	96.463	0.49	0.687	0.13	0.542005	0.507	1.944	1
Q.alba			SUN	8	38.396	73.766	69.45	32.928	12.741	8.638	1.761	6.992	9.962	9.168	1.47499	0.0797029	0.553	125.62	0.474	0.521	0.1	0.445005	0.519	1.933	1
Q.alba			SUN	9	43.99	73.303	74.704	32.939	12.808	8.452	2.498	7.484	10.664	9.347	1.51538	0.1235	0.589	126.862	0.441	0.6	0.099	0.509499	0.544	1.939	1
Q.alba			SUN	10	44.348	79.83	63.383	35.146	14.298	8.301	2.436	7.514	12.333	8.305	1.72244	0.326603	0.7	90.589	0.554	0.556	0.139	0.451162	0.462	1.947	1
Q.alba			SUN	11	47.758	86.92	65.541	35.964	13.842	9.51	2.731	7.798	11.367	9.56	1.45552	0.158969	0.729	89.946	0.549	0.549	0.14	0.464002	0.466	1.947	1
Q.alba			SUN	12	13.817	15.199	18.47	16.138	6.832	3.511	3.252	4.194	6.317	3.733	1.94588	0.409055	0.748	24.691	0.874	0.909	0.509	0.66669	0.251	1.954	1
Q.alba			SUN	13	5.572	6.25	11.998	10.527	4.521	2.15	0.017	2.664	4.322	2.181	2.10279	0.495373	0.464	25.833	0.877	0.892	0.486	0.631847	0.248	1.933	1
Q. bicolor	1	The Holden Arboretum, Kirtland, OH (USA)	SHADE	1	68.06	76.699	44.231	34.494	14.504	8.278	0.017	9.309	12.647	8.575	1.75211	0.321974	1.539	28.745	0.78	0.887	0.437	0.718811	0.314	1.975	1
Q. bicolor			SHADE	2	28.105	30.941	25.402	21.46	8.781	5.121	4.039	5.982	7.973	5.286	1.7147	0.337012	1.106	22.96	0.845	0.908	0.547	0.766892	0.271	1.966	1
Q. bicolor			SHADE	3	56.152	62.063	47.809	31.729	13.566	7.285	6.08	8.455	12.057	7.661	1.86218	0.364601	1.174	40.706	0.664	0.905	0.309	0.70091	0.389	1.974	1
Q. bicolor			SHADE	4	63.722	70.687	62.76	33.351	13.701	7.802	0.012	9.007	12.915	7.89	1.75609	0.389082	1.015	61.813	0.531	0.901	0.203	0.719916	0.478	1.976	1
Q. bicolor			SHADE	5	68.922	76.749	44.325	35.168	14.854	7.985	5.258	9.368	13.661	8.29	1.86024	0.393163	1.555	28.507	0.793	0.898	0.441	0.700281	0.305	1.976	1
Q. bicolor			SHADE	6	68.922	76.749	44.325	35.168	14.854	7.985	5.258	9.368	13.661	8.29	1.86024	0.393163	1.555	28.507	0.793	0.898	0.441	0.700281	0.305	1.976	1
Q. bicolor			SHADE	7	42.339	46.113	35.049	27.004	11.55	5.66	5.032	7.342	11.482	5.652	2.04064	0.507751	1.208	29.015	0.77	0.918	0.433	0.729616	0.32	1.971	1
Q. bicolor			SHADE	8	34.669	37.903	33.143	24.613	10.572	5.509	3.823	6.644	9.075	6.055	1.91904	0.332782	1.046	31.684	0.743	0.915	0.397	0.719154	0.338	1.967	1
Q. bicolor			SHADE	9	49.224	54.975	37.243	28.634	11.721	7.067	5.781	7.917	10.072	7.441	1.65855	0.261219	1.322	28.178	0.769	0.895	0.446	0.754437	0.321	1.972	1
Q. bicolor			SHADE	10	40.017	44.754	35.188	26.716	11.3	6.27	4.098	7.138	10.134	6.417	1.80223	0.366785	1.137	30.941	0.759	0.894	0.406	0.70455	0.327	1.97	1
Q. bicolor			SUN	1	84.96	96.241	54.82	38.614	15.245	10.166	0.012	10.401	13.402	10.159	1.49961	0.241979	1.55	35.372	0.704	0.883	0.355	0.716036	0.363	1.977	1
Q. bicolor			SUN	2	33.489	37.864	39.163	25.133	10.834	5.277	0.012	6.53	9.392	5.941	2.05306	0.36744	0.855	45.799	0.642	0.884	0.274	0.666229	0.403	1.967	1
Q. bicolor			SUN	3	62.481	70.644	42.989	33.823	14.271	7.764	5.111	8.919	13.065	7.863	1.8381	0.398163	1.453	29.578	0.787	0.884	0.425	0.686331	0.31	1.975	1
Q. bicolor			SUN	4	55.707	62.152	42.132	31.248	12.968	7.273	0.017	8.422	11.895	7.47	1.78303	0.372005	1.322	31.865	0.742	0.896	0.394	0.716927	0.339	1.972	1
Q. bicolor			SUN	5	67.185	73.896	43.307	33.808	13.744	8.324	0.059	9.249	12.228	8.386	1.65113	0.314197	1.551	27.915	0.781	0.909	0.45	0.738658	0.314	1.976	1
Q. bicolor			SUN	6	64.121	74.416	45.981	34.764	14.647	8.396	3.817	9.036	12.762	8.67	1.74452	0.320639	1.395	32.972	0.756	0.862	0.381	0.666731	0.329	1.974	1
Q. bicolor			SUN	7	59.952	67.326	42.962	32.524	13.695	7.519	6.129	8.737	12.301	7.878	1.82139	0.359564	1.395	30.786	0.757	0.89	0.408	0.712206	0.329	1.974	1
Q. bicolor			SUN	8	37.126	41.125	32.273	25.366	10.451	5.671	4.089	6.875	10.099	5.715	1.84288	0.434102	1.15	28.055	0.786	0.903	0.448	0.725077	0.31	1.968	1
Q. bicolor			SUN	9	37.126	41.125	32.273	25.366	10.451	5.671	4.089	6.875	10.099	5.715	1.84288	0.434102	1.15	28.055	0.786	0.903	0.448	0.725077	0.31	1.968	1
Q. bicolor			SUN	10	42.096	46.179	34.593	27.194	11.535	5.87	0.043	7.321	10.832	6.173	1.96508	0.430114	1.217	28.428	0.786	0.912	0.442	0.715327	0.31	1.97	1
Q. elipsoidalis	1	The Holden Arboretum, Kirtland, OH (USA)	SHADE	1	29.529	41.678	39.283	23.752	8.777	6.715	0.043	6.132	7.63	6.783	1.30707	0.111009	0.752	52.259	0.605	0.708	0.24	0.657746	0.428	1.949	1
Q. elipsoidalis			SHADE	2	21.197	30.367	38.373	20.274	7.644	5.469	1.825	5.195	6.624	6.009	1.3977	0.0928442	0.552	69.465	0.528	0.698	0.181	0.648045	0.48	1.935	1
Q. elipsoidalis			SHADE	3	45.486	71.957	63.047	30.765	10.473	9.295	2.469	7.61	9.625	9.291	1.12673	0.0347013	0.721	87.388	0.488	0.632	0.144	0.603912	0.509	1.951	1
Q. elipsoidalis			SHADE	4	59.954	92.98	70.912	35.147	11.941	10.54	2.075	8.737	10.714	10.539	1.13292	0.0163338	0.845	83.874	0.496	0.645	0.15	0.60989	0.503	1.955	1
Q. elipsoidalis			SUN	1	77.167	163.544	107.707	46.976	15.914	13.408	1.832	9.912	14.427	13.987	1.1869	0.0304984	0.716	150.334	0.436	0.472	0.084	0.43943	0.547	1.948	1
Q. elipsoidalis			SUN	2	8.706	15.671	24.427	14.828	5.303	4.22	0.019	3.329	4.727	4.326	1.25664	0.0848318	0.356	68.537	0.607	0.556	0.183	0.497581	0.426	1.907	0.999
Q. elipsoidalis			SUN	3	56.169	112.969	75.244	38.933	13.203	11.415	2.713	8.457	11.969	11.417	1.15664	0.0461191	0.746	100.797	0.517	0.497	0.125	0.465662	0.488	1.95	1
Q. elipsoidalis			SUN	4	30.907	60.399	53.455	28.519	9.427	8.506	1.336	6.273	9.232	8.508	1.10828	0.0784229	0.578	92.452	0.534	0.512	0.136	0.477527	0.476	1.936	1
Q. elipsoidalis	2	The Holden Arboretum, Kirtland, OH (USA)	SHADE	1	37.168	70.523	65.478	30.687	10.983	8.881	1.449	6.879	9.718	9.325	1.23669	0.0404404	0.568	115.35	0.469	0.527	0.109	0.495987	0.523	1.939	1
Q. elipsoidalis			SHADE	2	31.47	58.056	60.936	27.808	9.997	7.753	1.898	6.33	9.015	8.124	1.28944	0.0988353	0.516	117.99	0.456	0.542	0.107	0.511408	0.532	1.935	1
Q. elipsoidalis			SHADE	3	22.739	43.275	53.306	24.291	8.963	6.259	1.347	5.381	8.461	6.549	1.43202	0.225978	0.427	124.96	0.456	0.525	0.101	0.484273	0.533	1.925	1
Q. elipsoidalis			SHADE	4	9.18	16.517	28.123	15.077	5.712	4.013	1.29	3.419	5.173	4.123	1.42337	0.202977	0.326	86.161	0.536	0.556	0.146	0.507484	0.474	1.902	0.999
Q. elipsoidalis			SHADE	5	15.633	30.353	41.286	20.246	7.405	5.58	1.222	4.461	6.259	6.214	1.32706	0.00718965	0.379	109.035	0.49	0.515	0.115	0.479263	0.507	1.914	1
Q. elipsoidalis			SHADE	6	7.037	12.974	23.529	13.432	4.822	3.617	0.017	2.993	4.679	3.614	1.33315	0.227613	0.299	78.674	0.571	0.542	0.16	0.490135	0.45	1.891	0.999
Q. elipsoidalis			SHADE	7	11.612	18.507	25.904	16.034	6.074	4.171	1.795	3.845	5.141	4.815	1.45625	0.0634118	0.448	57.788	0.619	0.627	0.217	0.567588	0.418	1.925	1
Q. elipsoidalis			SHADE	8	24.673	39.112	43.77	22.979	8.539	6.191	1.709	5.605	7.921	6.349	1.37926	0.19846	0.564	77.651	0.525	0.631	0.162	0.587178	0.482	1.94	1
Q. elipsoidalis			SHADE	9	10.643	18.17	28.785	15.845	5.917	4.036	0.754	3.681	5.866	4.032	1.46606	0.312649	0.37	77.851	0.55	0.586	0.161	0.532708	0.464	1.915	1
Q. elipsoidalis			SHADE	10	20.692	42.447	49	23.909	8.572	7.093	0.017	5.133	7.3	7.184	1.20852	0.0158904	0.422	116.035	0.488	0.487	0.108	0.454872	0.509	1.925	1
Q. elipsoidalis			SHADE	11	23.65	43.127	52.158	24.051	8.614	6.865	0.861	5.487	7.38	7.368	1.25477	0.00162602	0.453	115.029	0.461	0.548	0.109	0.513777	0.529	1.928	1
Q. elipsoidalis			SHADE	12	17.409	30.011	39.689	20.639	8.006	5.19	1.363	4.708	6.899	5.559	1.54258	0.194231	0.439	90.481	0.52	0.58	0.139	0.513578	0.486	1.926	1
Q. elipsoidalis			SUN	1	43.361	107.291	79.329	38.163	13.29	10.879	0.56	7.43	12.247	11.604	1.22162	0.0525027	0.547	145.132	0.481	0.404	0.087	0.374131	0.514	1.938	1
Q. elipsoidalis			SUN	2	24.266	59.517	58.21	28.657	10.561	7.91	0.766	5.558	8.871	8.373	1.33515	0.056138	0.417	139.639	0.492	0.408	0.09	0.371319	0.506	1.918	1
Q. elipsoidalis			SUN	3	42.206	109.317	79.005	38.599	13.505	11.267	0.017	7.331	12.11	11.826	1.19863	0.0234517	0.534	147.888	0.489	0.386	0.085	0.355985	0.508	1.934	1
Q. falcata	1	The Holden Arboretum, Kirtland, OH (USA)	SHADE	1	25.758	28.415	22.336	20.422	8.256	4.971	4.031	5.727	7.338	5.304	1.66083	0.277187	1.153	19.368	0.914	0.907	0.649	0.776114	0.22	1.965	1
Q. falcata			SHADE	2	27.599	31.601	24.517	21.261	8.261	5.329	4.403	5.928	8.016	5.332	1.5502	0.33483	1.126	21.78	0.867	0.873	0.577	0.767248	0.256	1.967	1
Q. falcata			SHADE	3	24.3	27.214	21.902	19.543	7.671	5.069	4.169	5.562	6.255	5.789	1.51332	0.0745004	1.11	19.74	0.892	0.893	0.637	0.799528	0.237	1.965	1
Q. falcata			SHADE	4	19.657	21.964	20.213	17.851	6.944	4.309	3.515	5.003	6.941	4.307	1.61151	0.379484	0.972	20.785	0.883	0.895	0.605	0.775179	0.244	1.957	1
Q. falcata			SHADE	5	19.145	20.963	21.24	17.343	6.891	4.369	3.749	4.937	5.596	4.989	1.57725	0.10847	0.901	23.565	0.817	0.913	0.533	0.799865	0.29	1.963	1
Q. falcata			SHADE	6	31.966	35.615	29.495	22.587	8.845	5.309	4.269	6.38	8.842	5.304	1.66604	0.400136	1.084	27.216	0.766	0.898	0.462	0.787374	0.323	1.97	1
Q. falcata			SUN	1	80.329	99.281	51.478	37.638	14.188	9.611	0.017	10.113	13.752	9.595	1.47623	0.302283	1.56	32.99	0.731	0.809	0.381	0.712573	0.345	1.975	1
Q. falcata			SUN	2	71.6	91.425	47.292	37.099	14.778	9.436	2.43	9.548	12.866	10.172	1.56613	0.209389	1.514	31.237	0.784	0.783	0.402	0.65373	0.311	1.974	1
Q. falcata			SUN	3	93.777	118.946	56.382	40.907	15.44	10.815	0.046	10.927	13.507	11.465	1.42765	0.151181	1.663	33.898	0.726	0.788	0.371	0.704224	0.349	1.977	1
Q. falcata			SUN	4	93.147	126.806	60.13	42.47	16.369	11.321	4.098	10.89	13.158	11.665	1.4459	0.113467	1.549	38.816	0.706	0.735	0.324	0.648954	0.361	1.977	1
Q. falcata			SUN	5	50.491	61.806	36.712	29.936	11.876	7.387	3.85	8.018	11.534	7.377	1.60769	0.360413	1.375	26.694	0.815	0.817	0.471	0.708005	0.291	1.972	1
Q. imbricaria	1	The Holden Arboretum, Kirtland, OH (USA)	SHADE	1	16.801	17.115	20.02	19.077	8.943	2.877	2.867	4.625	8.937	2.873	3.10845	0.678527	0.839	23.856	0.953	0.982	0.527	0.580129	0.185	1.959	1
Q. imbricaria			SHADE	2	20.695	21.033	21.364	20.636	9.583	3.196	2.676	5.133	9.5	3.202	2.99844	0.662947	0.969	22.055	0.966	0.984	0.57	0.610695	0.17	1.961	1
Q. imbricaria			SHADE	3	24.631	24.991	24.254	23.196	10.861	3.443	2.609	5.6	10.765	3.446	3.15452	0.679889	1.016	23.883	0.956	0.986	0.526	0.575262	0.181	1.965	1
Q. imbricaria			SHADE	4	11.719	11.915	17.111	15.914	7.418	2.314	2.305	3.863	7.392	2.316	3.2057	0.686688	0.685	24.983	0.93	0.984	0.503	0.581489	0.207	1.952	1
Q. imbricaria			SHADE	5	24.646	24.884	23.346	21.853	9.913	3.504	3.495	5.602	9.868	3.516	2.82905	0.643697	1.056	22.115	0.936	0.99	0.568	0.648536	0.201	1.97	1
Q. imbricaria			SHADE	6	23.32	23.707	23.034	21.889	10.094	3.187	0.884	5.449	10.09	3.183	3.16724	0.684539	1.012	22.751	0.95	0.984	0.552	0.611627	0.188	1.966	1
Q. imbricaria			SHADE	7	21.424	21.712	22.875	21.406	10.001	3.174	3.158	5.223	9.983	3.173	3.15091	0.68216	0.937	24.423	0.936	0.987	0.515	0.587543	0.202	1.965	1
Q. imbricaria			SHADE	8	32.683	33.205	28.449	26.371	12.326	3.93	0.059	6.451	12.312	3.928	3.13639	0.680962	1.149	24.764	0.927	0.984	0.507	0.59058	0.209	1.968	1
Q. imbricaria			SUN	1	38.63	39.813	62.499	28.814	13.31	4.204	0.009	7.013	13.293	4.204	3.16603	0.683743	0.618	101.117	0.461	0.97	0.124	0.584692	0.529	1.97	1
Q. imbricaria			SUN	2	37.487	38.843	66.6	28.983	13.472	3.905	0.009	6.909	13.469	3.905	3.44994	0.710075	0.563	118.323	0.435	0.965	0.106	0.560795	0.548	1.969	1
Q. imbricaria			SUN	3	36.443	37.333	45.79	28.034	12.974	4.04	0.009	6.812	12.969	4.039	3.21139	0.688565	0.796	57.535	0.612	0.976	0.218	0.582712	0.423	1.971	1
Q. imbricaria			SUN	4	29.065	30	52.834	25.22	11.744	3.636	0.009	6.083	11.714	3.635	3.22992	0.689688	0.55	96.043	0.477	0.969	0.131	0.574235	0.517	1.966	1
Q. imbricaria			SUN	5	32.159	32.44	28.055	26.01	12.073	3.777	3.735	6.399	12.048	3.771	3.19645	0.687002	1.146	24.475	0.927	0.991	0.513	0.597354	0.209	1.969	1
Q. imbricaria			SUN	6	21.413	21.739	23.238	21.015	9.606	3.29	0.031	5.221	9.56	3.29	2.91976	0.655858	0.921	25.218	0.904	0.985	0.498	0.609296	0.228	1.963	1
Q. macrocarpa	1	The Holden Arboretum, Kirtland, OH (USA)	SHADE	1	55.503	67.57	57.063	33.188	13.585	7.796	2.283	8.406	12.734	7.803	1.74256	0.387231	0.973	58.667	0.582	0.821	0.214	0.633234	0.443	1.968	1
Q. macrocarpa			SHADE	2	60.819	79.199	74.02	35.24	14.561	8.359	2.254	8.8	13.258	8.523	1.74195	0.357143	0.822	90.085	0.476	0.768	0.139	0.615428	0.517	1.96	1
Q. macrocarpa			SHADE	3	80.599	95.69	64.719	38.351	15.835	9.257	2.891	10.13	14.82	9.255	1.7106	0.375506	1.245	51.968	0.593	0.842	0.242	0.68863	0.436	1.97	1
Q. macrocarpa			SHADE	4	25.9	32.561	38.549	22.362	9.205	5.505	1.566	5.743	7.159	6.224	1.67212	0.130605	0.672	57.376	0.58	0.795	0.219	0.650861	0.444	1.949	1
Q. macrocarpa			SHADE	5	24.226	30.087	33.61	22.011	9.262	5.177	1.921	5.554	7.988	5.516	1.78907	0.309464	0.721	46.63	0.655	0.805	0.269	0.628365	0.394	1.952	1
Q. macrocarpa			SHADE	6	41.844	52.944	52.195	28.828	11.701	6.765	2.183	7.299	10.798	7.053	1.72964	0.346823	0.802	65.107	0.552	0.79	0.193	0.632724	0.463	1.96	1
Q. macrocarpa			SHADE	7	26.857	34.215	38.2	22.968	9.464	5.531	1.881	5.848	8.831	5.527	1.71108	0.374137	0.703	54.332	0.601	0.785	0.231	0.639766	0.43	1.95	1
Q. macrocarpa			SHADE	8	66.516	80.452	81.853	36.729	15.726	7.762	2.727	9.203	15.107	7.79	2.02602	0.484345	0.813	100.726	0.449	0.827	0.125	0.619609	0.538	1.968	1
Q. macrocarpa			SHADE	9	40.841	51.903	60.487	29.534	11.915	6.987	2.114	7.211	11.2	7.016	1.70531	0.373571	0.675	89.583	0.488	0.787	0.14	0.588385	0.509	1.959	1
Q. macrocarpa			SHADE	10	63.144	81.357	92.213	35.29	14.392	8.854	0.031	8.966	12.427	9.146	1.62548	0.264022	0.685	134.664	0.383	0.776	0.093	0.637146	0.59	1.957	1
Q. macrocarpa			SHADE	11	65.899	81.281	82.132	35.846	14.519	9.018	2.496	9.16	12.972	9.108	1.61	0.297872	0.802	102.364	0.436	0.811	0.123	0.644477	0.547	1.964	1
Q. macrocarpa			SHADE	12	47.204	60.392	48.698	30.67	12.24	7.829	0.057	7.753	10.496	8.008	1.56342	0.237043	0.969	50.239	0.63	0.782	0.25	0.63061	0.411	1.963	1
Q. macrocarpa			SHADE	13	41.977	49.87	40.431	27.512	11.107	6.695	0.373	7.311	10.417	6.793	1.659	0.347893	1.038	38.941	0.68	0.842	0.323	0.69691	0.378	1.965	1
Q. macrocarpa			SUN	1	64.166	94.458	74.047	38.095	15.487	9.47	2.031	9.039	12.838	10.314	1.63537	0.196604	0.867	85.449	0.514	0.679	0.147	0.555621	0.49	1.957	1
Q. macrocarpa			SUN	2	46.779	63.298	58.385	31.258	12.559	8.006	2.199	7.718	10.802	8.124	1.5687	0.247917	0.801	72.871	0.535	0.739	0.172	0.601642	0.475	1.952	1
Q. macrocarpa			SUN	3	59.622	79.074	69.606	34.477	14.038	8.594	2.339	8.713	12.15	8.912	1.63347	0.266502	0.857	81.261	0.495	0.754	0.155	0.630315	0.503	1.958	1
Q. macrocarpa			SUN	4	55.804	70.018	71.633	32.578	13.158	7.904	2.455	8.429	11.838	8.512	1.66473	0.28096	0.779	91.951	0.455	0.797	0.137	0.660734	0.533	1.955	1
Q. macrocarpa			SUN	5	43.948	58.897	89.978	29.611	11.688	7.815	0.019	7.48	9.707	8.249	1.49559	0.150201	0.488	184.222	0.329	0.746	0.068	0.629858	0.635	1.951	1
Q. macrocarpa			SUN	6	31.959	44.225	76.97	26.345	10.74	6.608	0.012	6.379	9.675	6.64	1.6253	0.313695	0.415	185.376	0.342	0.723	0.068	0.578638	0.623	1.943	1
Q. macrocarpa			SUN	7	26.198	32.877	57.835	23.559	10.183	4.954	0.017	5.776	9.39	4.975	2.05551	0.470181	0.453	127.676	0.407	0.797	0.098	0.59315	0.57	1.949	1
Q. macrocarpa			SUN	8	78.102	111.596	119.656	41.939	17.265	10.011	2.058	9.972	14.746	10.554	1.7246	0.28428	0.653	183.319	0.35	0.7	0.069	0.558002	0.616	1.96	1
Q. macrocarpa			SUN	9	27.812	36.711	60.417	23.849	9.805	5.649	1.539	5.951	8.612	5.773	1.73571	0.329656	0.46	131.245	0.395	0.758	0.096	0.614471	0.58	1.941	1
Q. macrocarpa			SUN	10	46.076	63.954	82.342	31.531	12.827	7.838	1.872	7.659	10.93	8.384	1.63651	0.232937	0.56	147.156	0.383	0.72	0.085	0.582384	0.589	1.953	1
Q. macrocarpa			SUN	11	53.143	66.557	76.124	31.623	12.948	7.858	2.353	8.226	10.581	8.464	1.64775	0.200076	0.698	109.041	0.415	0.798	0.115	0.667805	0.564	1.962	1
Q. nigra	1	The Holden Arboretum, Kirtland, OH (USA)	SHADE	1	5.492	5.7	10.483	9.491	3.83	2.231	2.162	2.644	3.58	2.308	1.71672	0.355307	0.524	20.012	0.905	0.963	0.628	0.766155	0.227	1.935	1
Q. nigra			SHADE	2	21.148	21.894	21.539	19.884	8.376	4.155	0.019	5.189	8.216	4.157	2.01588	0.494036	0.982	21.937	0.923	0.966	0.573	0.672158	0.213	1.962	1
Q. nigra			SHADE	3	10.761	11.595	37.158	14.137	5.896	3.137	0.009	3.702	5.611	3.158	1.8795	0.437177	0.29	128.309	0.38	0.928	0.098	0.676625	0.591	1.948	1
Q. nigra			SHADE	4	2.486	2.682	18.125	6.766	2.875	1.344	0.009	1.779	2.872	1.342	2.13914	0.53273	0.137	132.165	0.373	0.927	0.095	0.682413	0.597	1.913	1
Q. nigra			SHADE	5	16.49	18.385	45.934	17.338	6.899	4.082	0.009	4.582	6.614	4.077	1.6901	0.38358	0.359	127.952	0.377	0.897	0.098	0.689338	0.594	1.957	1
Q. nigra			SHADE	6	16.445	19.701	52.986	18.032	7.379	4.267	0.024	4.576	7.037	4.261	1.72932	0.394486	0.31	170.72	0.34	0.835	0.074	0.635559	0.625	1.957	1
Q. nigra			SHADE	7	11.107	12.182	36.567	13.905	5.628	3.135	0.009	3.761	5.391	3.158	1.79522	0.414209	0.304	120.385	0.38	0.912	0.104	0.721879	0.592	1.949	1
Q. nigra			SHADE	8	7.713	8.84	27.582	12.304	5.102	2.749	0.009	3.134	4.855	2.751	1.85595	0.433368	0.28	98.629	0.446	0.873	0.127	0.640237	0.54	1.937	1
Q. nigra			SHADE	9	6.855	7.82	32.155	11.799	5.087	2.43	0.009	2.954	5.083	2.429	2.09342	0.522133	0.213	150.82	0.367	0.877	0.083	0.618767	0.603	1.93	1
Q. nigra			SHADE	10	12.378	13.188	36.663	14.941	6.103	3.345	0.009	3.97	5.852	3.343	1.82451	0.428742	0.338	108.597	0.408	0.939	0.116	0.696789	0.57	1.95	1
Q. nigra			SHADE	11	9.432	10.028	38.858	13.251	5.416	2.757	0.009	3.465	5.344	2.755	1.96445	0.484469	0.243	160.08	0.341	0.941	0.079	0.67502	0.624	1.945	1
Q. nigra			SHADE	12	7.629	8.401	34.367	11.642	4.809	2.682	0.009	3.117	4.47	2.801	1.79306	0.373378	0.222	154.816	0.339	0.908	0.081	0.70733	0.626	1.945	1
Q. nigra			SHADE	13	9.701	10.398	36.955	13.191	5.378	2.844	0.009	3.515	5.268	2.866	1.891	0.455961	0.263	140.775	0.357	0.933	0.089	0.700601	0.611	1.948	1
Q. nigra			SUN	1	16.691	18.64	33.245	16.816	6.636	4.099	0.009	4.61	6.027	4.114	1.61893	0.317405	0.502	66.218	0.506	0.895	0.19	0.741732	0.496	1.958	1
Q. nigra			SUN	2	16.677	18.06	28.255	16.536	6.469	4.296	0.009	4.608	5.662	4.339	1.50582	0.233663	0.59	47.872	0.585	0.923	0.263	0.76642	0.441	1.959	1
Q. nigra			SUN	3	15.629	16.556	32.909	15.775	6.15	4.006	0.009	4.461	5.739	4.005	1.5352	0.302143	0.475	69.294	0.479	0.944	0.181	0.789228	0.515	1.957	1
Q. nigra			SUN	4	7.229	7.615	21.554	11.371	4.456	2.677	0.009	3.034	4.357	2.679	1.66455	0.385127	0.335	64.27	0.528	0.949	0.196	0.702572	0.48	1.943	1
Q. nigra			SUN	5	8.241	9.015	26.236	12.074	4.947	2.758	0.009	3.239	4.611	2.786	1.79369	0.395793	0.314	83.524	0.46	0.914	0.15	0.710375	0.529	1.94	1
Q. nigra			SUN	6	6.594	7.197	25.837	11.168	4.793	2.35	0.009	2.898	4.526	2.396	2.03957	0.470614	0.255	101.238	0.432	0.916	0.124	0.664367	0.55	1.936	1
Q. nigra			SUN	7	10.218	11.187	29.306	13.385	5.352	3.265	0.009	3.607	4.929	3.263	1.6392	0.338	0.349	84.052	0.457	0.913	0.15	0.716703	0.532	1.945	1
Q. nigra			SUN	8	11.173	13.126	28.169	14.798	6.022	3.518	0.009	3.772	5.654	3.533	1.71177	0.375133	0.397	71.02	0.525	0.851	0.177	0.641171	0.482	1.947	1
Q. nigra			SUN	9	5.473	5.681	10.466	9.475	3.823	2.227	2.158	2.64	3.574	2.304	1.71666	0.355344	0.523	20.012	0.905	0.963	0.628	0.766085	0.227	1.935	1
Q. nigra			SUN	10	21.076	21.819	21.502	19.85	8.362	4.148	0.019	5.18	8.202	4.15	2.01591	0.494026	0.98	21.937	0.923	0.966	0.573	0.672167	0.213	1.962	1
Q. robur	1	The Holden Arboretum, Kirtland, OH (USA)	SHADE	1	45.087	55.788	42.27	29.89	12.595	6.395	1.792	7.577	12.385	6.437	1.96951	0.480258	1.067	39.629	0.707	0.808	0.317	0.634175	0.361	1.964	1
Q. robur			SHADE	2	14.347	15.87	19.812	15.964	6.823	3.345	0.035	4.274	6.822	3.343	2.03976	0.509968	0.724	27.359	0.806	0.904	0.459	0.707437	0.297	1.952	1
Q. robur			SUN	1	24.543	28.663	53.31	21.16	8.757	4.708	0.009	5.59	8.568	4.74	1.86003	0.446779	0.46	115.794	0.397	0.856	0.109	0.688821	0.578	1.957	1
Q. robur			SUN	2	27.037	32.571	66.533	22.573	9.452	4.877	0.009	5.867	9.054	4.982	1.93808	0.449746	0.406	163.726	0.339	0.83	0.077	0.666791	0.626	1.957	1
Q. robur			SUN	3	36.271	42.808	61.689	25.354	10.375	5.472	0.009	6.796	10.368	5.469	1.89602	0.472512	0.588	104.919	0.411	0.847	0.12	0.709049	0.567	1.964	1
Q. robur			SUN	4	13.25	15.19	21.74	15.879	6.7	3.096	1.593	4.107	6.531	3.134	2.16408	0.520135	0.61	35.668	0.73	0.872	0.352	0.660358	0.346	1.942	1
Q. robur			SUN	5	51.722	60.43	44.262	31.199	12.769	6.502	2.62	8.115	12.626	6.5	1.96386	0.485189	1.169	37.878	0.705	0.856	0.332	0.667735	0.362	1.97	1
Q. rubra	1	The Holden Arboretum, Kirtland, OH (USA)	SHADE	1	46.38	62.351	57.448	29.633	11.329	7.29	0.035	7.685	10.61	7.696	1.55405	0.274647	0.807	71.158	0.516	0.744	0.177	0.663727	0.489	1.957	1
Q. rubra			SHADE	2	71.282	121.837	109.427	41.512	16.166	10.958	0.031	9.527	12.937	11.481	1.47527	0.112545	0.651	167.986	0.379	0.585	0.075	0.519807	0.592	1.95	1
Q. rubra			SHADE	3	29.125	43.901	47.802	25.782	10.823	6.056	0.024	6.09	7.947	7.55	1.78715	0.049956	0.609	78.456	0.539	0.663	0.16	0.550608	0.472	1.945	1
Q. rubra			SUN	1	52.117	87.978	106.137	34.573	12.768	9.756	0.049	8.146	10.736	10.424	1.30873	0.0290611	0.491	216.149	0.326	0.592	0.058	0.547917	0.638	1.934	1
Q. rubra			SUN	2	50.257	87.035	98.438	35.016	13.619	9.108	0.017	7.999	11.068	10.345	1.49528	0.0653235	0.511	192.81	0.356	0.577	0.065	0.515078	0.612	1.936	1
Q. rubra			SUN	3	62.27	102.281	98.825	37.503	14.281	10.003	0.995	8.904	12.122	10.838	1.42767	0.105923	0.63	156.842	0.379	0.609	0.08	0.556361	0.592	1.946	1
Q. rubra			SUN	4	49.817	79.471	77.164	33.036	12.643	8.868	0.024	7.964	10.089	10.022	1.42569	0.0066409	0.646	119.523	0.428	0.627	0.105	0.573604	0.554	1.948	1
Q. rubra			SUN	5	49.916	77.455	72.346	32.622	12.493	8.741	0.019	7.972	10.094	9.398	1.42924	0.0689519	0.69	104.856	0.451	0.644	0.12	0.589425	0.536	1.955	1
Q. rubra			SUN	6	42.856	61.647	63.481	28.8	10.489	8.061	0.026	7.387	9.19	8.466	1.3012	0.0787813	0.675	94.032	0.454	0.695	0.134	0.649287	0.534	1.954	1
Q. rubra			SUN	7	65.704	108.119	94.397	39.049	15.424	9.759	0.94	9.146	11.969	11.736	1.58049	0.019467	0.696	135.621	0.414	0.608	0.093	0.541479	0.565	1.946	1
Q. rubra			SUN	8	45.031	74.85	75.47	32.125	12.286	8.859	3.647	7.572	9.719	9.485	1.38684	0.0240766	0.597	126.485	0.426	0.602	0.099	0.548321	0.556	1.939	1
Q. rubra			SUN	9	65.54	107.85	94.279	39.001	15.405	9.747	0.939	9.135	11.955	11.721	1.58049	0.0195734	0.695	135.621	0.414	0.608	0.093	0.541458	0.565	1.946	1
Q. rubra			SUN	10	44.919	74.664	75.376	32.085	12.271	8.848	3.643	7.563	9.707	9.473	1.38687	0.0241063	0.596	126.485	0.426	0.602	0.099	0.548322	0.556	1.939	1
Q. shumardi	1	The Holden Arboretum, Kirtland, OH (USA)	SHADE	1	88.286	144.935	73.52	44.951	16.211	12.509	0.017	10.602	13.569	12.535	1.29595	0.0762031	1.201	61.224	0.611	0.609	0.205	0.549064	0.423	1.967	1
Q. shumardi			SHADE	2	74.083	125.622	69.286	42.058	15.176	11.756	4.846	9.712	12.802	11.91	1.29092	0.0696766	1.069	64.8	0.607	0.59	0.194	0.526297	0.426	1.964	1
Q. shumardi			SUN	1	47.648	83.651	93.8	33.685	12.304	9.591	0.009	7.789	10.79	9.751	1.28287	0.0962929	0.508	184.655	0.359	0.57	0.068	0.527693	0.609	1.937	1
Q. shumardi			SUN	2	45.925	78.164	80.035	32.761	11.967	9.26	0.009	7.647	9.885	9.752	1.29233	0.0134547	0.574	139.48	0.409	0.588	0.09	0.537706	0.568	1.949	1
Q. shumardi			SUN	3	24.92	42.579	44.569	24.642	9.076	6.767	0.012	5.633	7.981	7.134	1.34121	0.106127	0.559	79.713	0.553	0.585	0.158	0.515711	0.463	1.934	1
Q. shumardi			SUN	4	30.773	54.627	55.907	27.681	10.65	7.266	0.913	6.26	9.861	7.263	1.46573	0.263462	0.55	101.569	0.495	0.563	0.124	0.50468	0.504	1.936	1
Q. shumardi			SUN	5	33.866	56.861	55.941	27.714	10.094	7.723	1.243	6.567	8.894	8.15	1.30701	0.0836519	0.605	92.407	0.495	0.596	0.136	0.554084	0.503	1.939	1
Q. shumardi			SUN	6	60.172	98.762	77.061	37.163	14.071	9.398	3.45	8.753	12.333	10.369	1.49723	0.159248	0.781	98.691	0.482	0.609	0.127	0.547498	0.513	1.952	1
Q. shumardi			SUN	7	38.58	62.825	53.03	29.922	11.309	8.343	1.976	7.009	9.062	8.671	1.35551	0.0431472	0.728	72.892	0.564	0.614	0.172	0.541491	0.455	1.953	1
Q. shumardi			SUN	8	75.553	124.82	86.666	41.489	14.985	11.606	2.395	9.808	12.971	11.666	1.29114	0.100609	0.872	99.413	0.479	0.605	0.126	0.551564	0.515	1.955	1
Q. sp NI	1	The University of Akron campus, Akron, OH (USA)	SHADE	1	123.412	196.029	91.035	51.345	18.432	15.161	2.191	12.535	15.359	15.322	1.21575	0.00240901	1.356	67.152	0.564	0.63	0.187	0.588262	0.455	1.97	1
Q. sp NI			SHADE	2	93.489	150.341	77.298	44.894	15.57	12.686	0.017	10.91	14.304	12.678	1.22734	0.113674	1.209	63.911	0.581	0.622	0.197	0.5829	0.444	1.968	1
Q. sp NI			SHADE	3	66.855	99.527	57.076	36.576	12.791	10.63	2.079	9.226	11.296	10.625	1.20329	0.0594016	1.171	48.728	0.641	0.672	0.258	0.627988	0.404	1.967	1
Q. sp NI			SHADE	4	72.225	117.783	64.004	41.52	16.143	11.418	1.078	9.59	12.828	11.772	1.41382	0.0823199	1.128	56.718	0.649	0.613	0.222	0.526481	0.399	1.966	1
Q. sp NI			SHADE	5	73.183	123.132	71.287	41.257	15.478	11.666	0.017	9.653	12.7	11.922	1.32676	0.0612598	1.027	69.44	0.579	0.594	0.181	0.540287	0.445	1.961	1
Q. sp NI			SHADE	6	35.009	57.586	39.441	29.095	11.291	7.74	0.017	6.676	9.24	8.287	1.45879	0.103139	0.888	44.434	0.738	0.608	0.283	0.5197	0.341	1.954	1
Q. sp NI			SHADE	7	72.917	122.684	71.157	41.182	15.45	11.645	0.017	9.635	12.677	11.901	1.32675	0.0612132	1.025	69.44	0.579	0.594	0.181	0.540286	0.445	1.961	1
Q. sp NI			SHADE	8	34.945	57.481	39.405	29.068	11.281	7.733	0.017	6.67	9.232	8.279	1.45881	0.103228	0.887	44.434	0.738	0.608	0.283	0.519714	0.341	1.954	1
Q. velutina	1	The Holden Arboretum, Kirtland, OH (USA)	SHADE	1	88.123	138.482	77.891	43.243	15.422	12.36	0.478	10.593	13.417	12.621	1.24773	0.0593277	1.131	68.847	0.555	0.636	0.183	0.592199	0.461	1.967	1
Q. velutina			SHADE	2	98.987	131.129	82.339	42.424	16.226	11.444	5.096	11.227	13.003	12.619	1.41786	0.0295316	1.202	68.491	0.515	0.755	0.183	0.691138	0.489	1.972	1
Q. velutina			SHADE	3	38.83	54.263	54.672	27.475	10.643	7.416	2.459	7.031	8.623	8.067	1.43514	0.0644787	0.71	76.977	0.503	0.716	0.163	0.646401	0.498	1.953	1
Q. velutina			SUN	1	50.308	95.599	71.144	35.864	12.225	10.373	0.042	8.003	11.624	10.438	1.17854	0.10203	0.707	100.611	0.504	0.526	0.125	0.491507	0.497	1.95	1
Q. velutina			SUN	2	48.547	89.683	75.367	35.037	12.373	9.997	2.755	7.862	10.753	10.614	1.23767	0.0129266	0.644	117.006	0.465	0.541	0.107	0.496957	0.526	1.953	1
Q. velutina			SUN	3	28.562	49.69	46.639	26.84	10.224	6.921	1.45	6.03	9.191	7.124	1.47724	0.224894	0.612	76.156	0.575	0.575	0.165	0.498234	0.447	1.949	1
